# Supplementary material
Source: publisher figshare collection journal article supplement (https://frontiersin.figshare.com/ndownloader/files/28982166)
Supplement: Supplementary file 1 [file 28982166]

Appendix 1 Table. Studied lakes: their geographical coordinates, sampling years, number of sampling events and sampling effort (hours of gillnet into the water) in each phase of the hydrological cycle (HW = high water, LW = low water).

| Lake | Year | Latitude | Longitude | Events | | Effort | |
| --- | --- | --- | --- | --- | --- | --- | --- |
|  |  |  |  | HW | LW | HW | LW |
| Araçá | 2007 | 03°45'54.5"S | 62°20'41.9"W | 8 | 8 | 96 | 96 |
| Laguinho | 2011 | 3°22'59.20"S | 60°11'50.04" | 1 | 1 | 48 | 48 |
| Calado | 2011 | 03°18'50.0"S | 60°34'51.0"W | 3 | 2 | 144 | 96 |
| Camaleão | 2011 | 03°39'51.6"S | 60°54'35.3"W | 1 | 1 | 48 | 48 |
| Camboa | 2011 | 03°35'03.2"S | 69°59'38.5"W | 1 | 1 | 48 | 48 |
| Central | 2011 | 03°15'13.8"S | 59°58'12.3"W | 3 | 2 | 144 | 96 |
| Maracá | 2007 | 03°50'40.6"S | 62°34'30.1"W | 8 | 8 | 96 | 96 |
| Padre | 2011 | 03°11'47.8"S | 59°55'53.3"W | 3 | 2 | 144 | 96 |
| Sacambú | 2011 | 03°98’12.0”S | 59°56’26.0"W | 3 | 2 | 144 | 96 |
| Tupé | 2003 | 03°02'35.4”S | 60°15'17.5"W | 1 | 1 | 24 | 24 |
| Canauiri Pequeno | * | 02°37'25.5"S | 60°50'21.5"W | 5 | 5 | 120 | 120 |
| Canauiri Grande | * | 02°37'28.2"S | 60°49'04.9"W | 5 | 5 | 120 | 120 |
| Arraia | * | 02°42'08.3"S | 60°47'47.7"W | 5 | 5 | 120 | 120 |
| Prato | * | 02°42'14.8"S | 60°44'46.2"W | 5 | 5 | 120 | 120 |
| Erudá | ** | 01°03'21.6"S | 63°29'01.2"W | 2 | 2 | 120 | 120 |
| Maranhão | ** | 00°49'55.1"S | 63°18'28.9"W | 2 | 2 | 120 | 120 |

* 2009, 2010, 2011, 2014 e 2015, ** 2012,2013
